# Supplementary material for: Concentrated Hypoxia-Preconditioned Adipose Mesenchymal Stem Cell-Conditioned Medium Improves Wounds Healing in Full-Thickness Skin Defect Model
Source: PubMed Central journal article supplement (PMC4897251; doi:10.1155/2014/652713), 2014-11-25
Supplement: 652713.f1.pdf [file 652713.f1.pdf]

Table 1. Characteristic of the included studies

| Author (year)         | Research type              | the kind of cells                                                       | Preconditioned | Model                                                                 | conditioned medium group                                                                                        | other group                                               | Assessment in vivo                                                                                                                                    | Conclusion                                                                                                                                                     |
|-----------------------|----------------------------|-------------------------------------------------------------------------|----------------|-----------------------------------------------------------------------|-----------------------------------------------------------------------------------------------------------------|-----------------------------------------------------------|-------------------------------------------------------------------------------------------------------------------------------------------------------|----------------------------------------------------------------------------------------------------------------------------------------------------------------|
| Tam K (2014) [11]     | parallel controlled design | Wharton`s jelly of human umbilical cords mesenchymal stem cells(hWJSCs) | None           | Excisional wounds in mice;<br>Diabetic wounds in immunodeficient mice | hWJSCs-CM(conditioned medium)+AV/PCL (aloe vera-polycaprolactone);<br>CCD(Human foreskin fibroblasts)-CM+AV/PCL | hWJSCs+AV/PCL;<br>CCD+AV/PCL;<br>PBS+AV/PCL;<br>untreated | rapid wound closure;<br>wound closure rates;<br>histological examination;<br>TaqMan qRT-PCR                                                           | hWJSCs with nanoscaffold may be a idea wound dressings for slow healing and hard-to-heal wounds                                                                |
| Jun EK (2014) [12]    | parallel controlled design | Human amniotic fluid-derived mesenchymal stem cells(AF-MSCs)            | Hypoxia        | excisional wounds splinting model                                     | AF-MSCs-hypoxia CM;<br>AF-MSCs-normal CM                                                                        | Vehicle medium(DMEM/F12)                                  | General observation;<br>degree of wound closure;<br>H&E staining;<br>Immunohistochemistry                                                             | AF-MSCs-hypoxia CM improves the wound healing through fibronectin-enhanced cell migration and TGF- $\beta$ /SMAD2 and PI3K/AKT signal pathways                 |
| Fong CY (2014) [13]   | parallel controlled design | Wharton`s jelly of human umbilical cords mesenchymal stem cells(hWJSCs) | None           | excisional wounds in mice;<br>diabetic wounds in immunodeficient mice | hWJSCs-CM;<br>CCD(Human foreskin fibroblasts)-CM                                                                | hWJSCs;<br>CCD;<br>unconditioned medium                   | General observation;<br>percentage healing rates;<br>Immunohistochemistry;<br>molecular analysis                                                      | hWJSCs enhance healing of excisional and diabetic wounds via differentiation and secretion                                                                     |
| Chen L (2014) [5]     | parallel controlled design | Bone marrow-derived mesenchymal stem cells(BM-MSC)                      | Hypoxia        | full-thickness excisional wounds in nude mice                         | BM-MSC normal CM;<br>BM-MSC hypoxia CM                                                                          | Vehicle control                                           | Immunohistochemical;<br>Immunofluorescence                                                                                                            | Hypoxic BM-MSCs and their secreted products might be enhance tissue repair subcutaneous injury                                                                 |
| Arno AI (2014) [14]   | parallel controlled design | Human Wharton`s jelly-derived Mesenchymal stem cells(WJ-MSCs)           | None           | Full-thickness skin excisional wounds in BALB/c mice                  | WJ-MSC-CM with Matrigel                                                                                         | Non-conditioned medium with Matrigel                      | Wound healing rates;<br>Immunohistochemisty(Brdu)                                                                                                     | Human WJ-MSCs promote wound healing by paracrine signaling in culture conditions in vivo model                                                                 |
| Zhou BR (2013) [15]   | parallel controlled design | Human adipose-derived stem cells(ADSCs)                                 | None           | Fractional carbon dioxide laser resurfacing(FxCR) on human skin       | ADSCs-CM                                                                                                        | Dulbecco`s modified Eagle`s Medium(DMEM)                  | Dermatological changes(erythema, melanin, TEWL, elasticity);<br>Histopathological analysis(H&E, Masson-Trichrome, Gomori`s aldehyde fuchsin staining) | Allogenic ADSC-CM could be an effective method for enhancing wound healing and reducing transient unwanted adverse effects after FxCR skin rejuvenation        |
| Tamari M (2013) [16]  | parallel controlled design | Bone marrow-derived mesenchymal stem cells(BM-MSC)                      | None           | Excisional wound-splinting mouse model                                | BM-MSC-CM                                                                                                       | BM-MSC;<br>Phosphate-buffered saline(PBS) (control)       | Macroscopical and histological observation                                                                                                            | MSC-CM contains growth factor derived from stem cells, is able to accelerate wound healing as well as stem cell transplantation                                |
| Zimber MP (2012) [17] | parallel controlled design | Human cells(BM-MSCs?)                                                   | Hypoxia        | Human postlaser wounds                                                | Concentration of human Cells conditioned medium(hCCM) ( $\times 0.1$ , $\times 1$ , $\times 10$ )               | Gel without hCCM                                          | Erythema; edema; dryness;<br>peeling; transepidermal water loss                                                                                       | The utility of $\times 10$ concentration hCCM appears to promote more rapid, scarless wound healing after resurfacing procedures and more normal skin recovery |

|                       |                            |                                                                         |                                               |                                                                                                                                 |                                                                                    |                                                                        |                                                                                   |                                                                                                                                                                            |
|-----------------------|----------------------------|-------------------------------------------------------------------------|-----------------------------------------------|---------------------------------------------------------------------------------------------------------------------------------|------------------------------------------------------------------------------------|------------------------------------------------------------------------|-----------------------------------------------------------------------------------|----------------------------------------------------------------------------------------------------------------------------------------------------------------------------|
| Mishra PJ (2012) [18] | parallel controlled design | Bone marrow-derived human mesenchymal stem cells(BMD-hMSCs)             | None                                          | Excisional wounds in NOD/SCID and nude mice                                                                                     | Conditioned medium concentrate from hMSC(Hmsc(CMC))                                | Saline (control) group                                                 | Healing time; Immunohistochemistry                                                | Cell-free derivatives of human MSCs are useful for wound healing purposes                                                                                                  |
| Yew TL (2011) [4]     | parallel controlled design | Bone marrow-derived mesenchymal stem cells(BM-MSCs)                     | None                                          | Excisional wound splinting model in BALB/c mice                                                                                 | Conditioned medium from MSCs; Conditioned medium from MSCs+anti IL-6               | $\alpha$ -minimal essential medium( $\alpha$ -MEM); $\alpha$ -MEM+IL-6 | The percentage of wound closure; Histologic examination                           | MSCs promote wound healing through releasing a repertoire of paracrine factors via activation of p38 MAPK                                                                  |
| Lee MJ (2011) [19]    | parallel controlled design | Human embryonic stem cell-derived endothelial precursor cells(hESC-EPC) | None                                          | Excisional wound model in BALB/c nude mice                                                                                      | hESC-EPC conditioned medium;Cord blood-EPC conditioned medium                      | Control vehicle medium                                                 | Wound closure time; the percentage of wound closure; immunohistochemical analysis | The spectrum of cytokines released by hESC-EPC are functionally involved in the wound healing process                                                                      |
| Heo SC (2011) [20]    | parallel controlled design | Human adipose-derived stem cells(ASCs)                                  | Tumor necrosis factor (TNF)- $\alpha$ treated | Cutaneous wound healing model in Sprague-Dawley rats                                                                            | TNF- $\alpha$ conditioned medium; control contioned medium                         | PBS(control)                                                           | Immunocytochemistry and histological analysis                                     | TNF- $\alpha$ -activated ASCs accelerate cutaneous wound healing through paracrine mechanisms involving IL-6 and IL-8                                                      |
| Yoon BS (2010) [21]   | parallel controlled design | Amniotic fluid-derived mesenchymal stem cells(AF-MSCs)                  | None                                          | Excisional wound model in mice                                                                                                  | AF-MSCs-conditioned medium                                                         | Control medium                                                         | The percentage of wound closure; histologic examination; immunochemistry          | AF-MSCs secreted high levels of factors, which could enhance wound healing, may represent a novel therapy to improve the effectiveness of tissue repair                    |
| Cho JW (2010) [22]    | parallel controlled design | Adipose-derived stem cells(ADSCs)                                       | Tumor growth factor (TGF)- $\beta$ 1 treated  | Excisional wound model in hairless mice                                                                                         | TGF- $\beta$ 1-treated ADSCs-conditioned medium; ADSCs-conditioned medium(control) | -                                                                      | Wound reducing size; histological analysis(?Not in result)                        | ADSCs-CM play important roles on promotion of wound healing in skin through up-regulation of type 1 collagen, MMP-1 expression, migration and proliferation of fibroblasts |
| Templin C (2009) [23] | parallel controlled design | Immortalization of murine haematopoietic progenitor cells(Dkmix cells)  | None                                          | Full-thickness excisional wound model in C57BL/6 mice                                                                           | Dkmix cells' conditioned medium                                                    | Dkmix cells; PBS                                                       | The precentage of wound closure; Histological examination                         | Immortalized haematopoietic progenitor cells(Dkmix cells) significantly improve dermal wound healing by paracrine effects                                                  |
| Lee EY (2009) [24]    | parallel controlled design | Adipose-derived stem cells(ADSCs)                                       | Hypoxia                                       | Full-thickness wounds in female hairless mice                                                                                   | Hypoxia-ADSCs conditioned medium; Normal-ADSCs conditioned medium                  | -                                                                      | Remaining wound area                                                              | Hypoxia increases the proliferation of ADSCs and enhance the wound healing function of ADSCs,at least partly, by up-regulating the secretion of VEGF and bFGF              |
| Kellar RS (2009) [25] | parallel controlled design | Neonatal fibroblasts                                                    | Hypoxia                                       | Ablative Fractional Erbium Laser in the peri-oral and peri-ocular; nonablative Fractional Erbium Laser on the remainder of face | Hypoxic conditioned culture medium(HCCM) of neonatal fibroblasts(ReGenica™)        | Vehicle gel formulation(control)                                       | The amount of erythema(clinical evaluation, bioinstrumental assessment)           | This HCCM product greatly improved in erythema and re-epithelization of the peri-oral and peri-ocular regions.                                                             |
| Chen L (2008) [26]    | parallel controlled design | Bone marrow derived mesenchymal stem cells(BM-MSCs)                     | None                                          | Excisional wound splinting model in BALB/c mice                                                                                 | Fibroblast-conditioned medium;MSC-conditioned medium                               | Pre-conditioned medium                                                 | The percentage of wound closure; Immunostaining and confocal microscopy           | BM-MSCs released high levels of cytokines and chemokines which could enhance normal wound healing.                                                                         |
